# Supplementary material for: One-step synthesis of a thioester chiral PMO and its use as a catalyst in asymmetric oxidation reactions
Source: Royal Society of Chemistry journal article supplement (doi:10.1039/c2jm15381e), 2011-12-20

Supplementary Information for:

**One-step synthesis of a thioester chiral PMO and its use as  
catalyst in asymmetric oxidation reactions**

Manuscript ID JM-ART-10-2011-015381

**Rafael A. García, Victoria Morales y Teresa Garcés**

**Supplementary information**

**Figure SI-1.** TEM images recorded for sample S1-40 which corresponds to the one-pot thioester chiral PMOs.

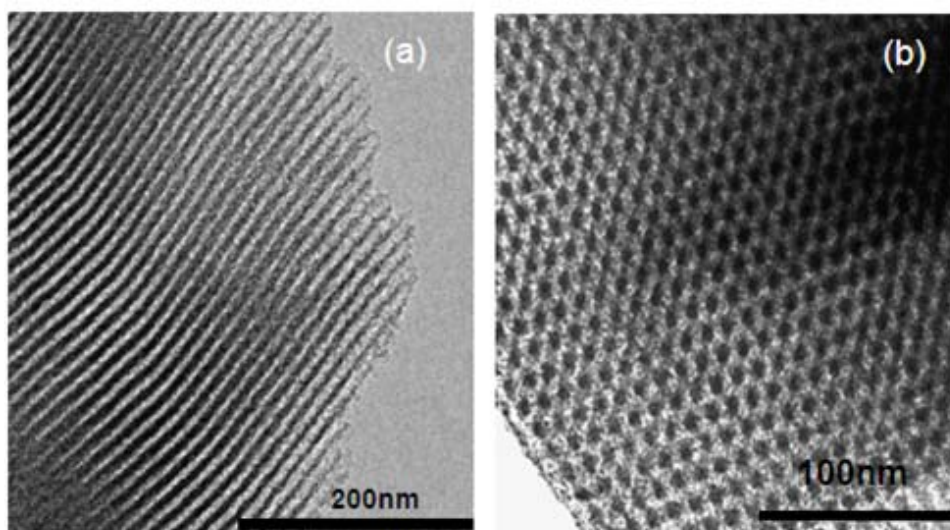

**Figure SI-2.** X-ray diffraction patterns achieved for MPTMS materials functionalized with different organic loadings.

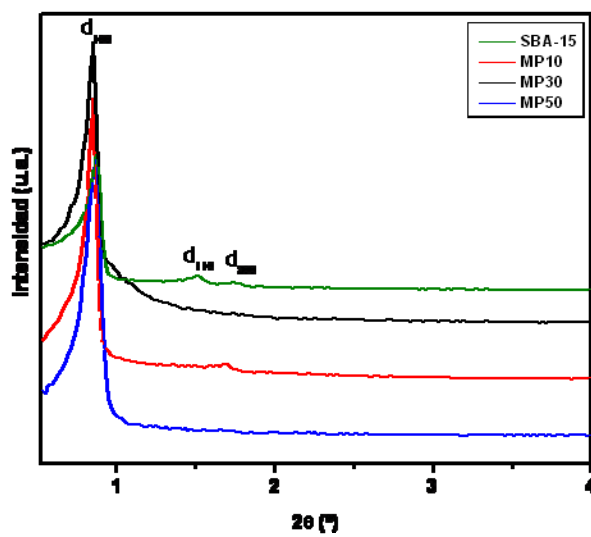

**Figure SI-3.** TEM images recorded for sample MP30 containing 30% mole of thiol groups referred to silica.

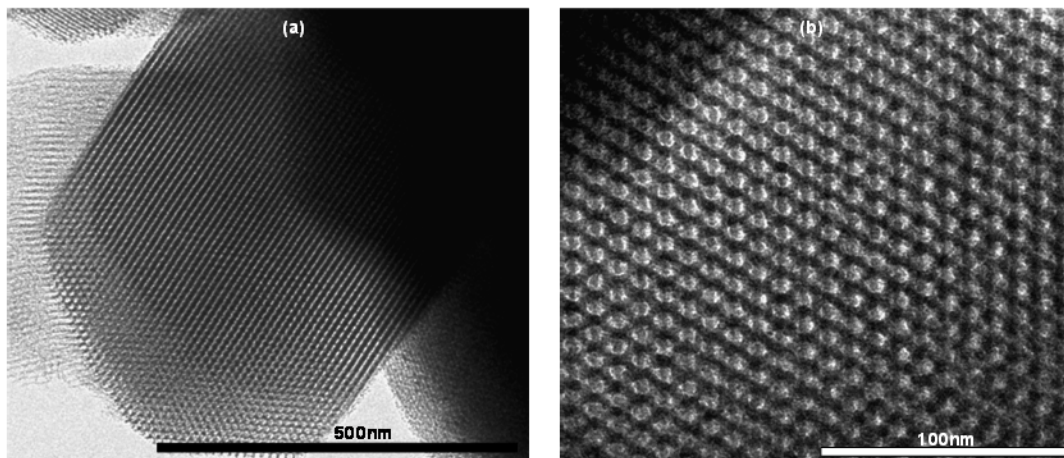

**Figure SI-4.**  $^{13}\text{C}$  NMR spectra recorded for sample MP30 containing 30% mole of thiol groups referred to silica.

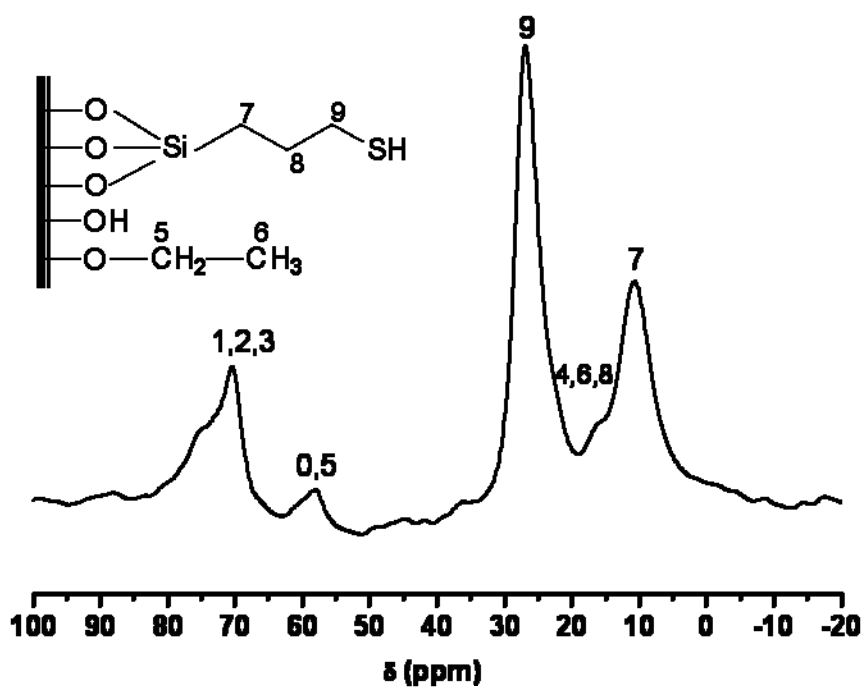

Supplement: c2jm15381e.pdf [file c2jm15381e.pdf]
